# Supplementary material for: A Conformational Change in the N Terminus of SLC38A9 Signals mTORC1 Activation
Source: Structure. Author manuscript; Available in PMC 2023 Mar 8. (PMC9994763; doi:10.1016/j.str.2020.11.014)
Supplement: 1 [file NIHMS1878588-supplement-1.pdf]

**Structure, Volume 29**

**Supplemental Information**

**A Conformational Change  
in the N Terminus of SLC38A9  
Signals mTORC1 Activation**

**Hsiang-Ting Lei, Xuelang Mu, Johan Hattne, and Tamir Gonen**

Fig. S1

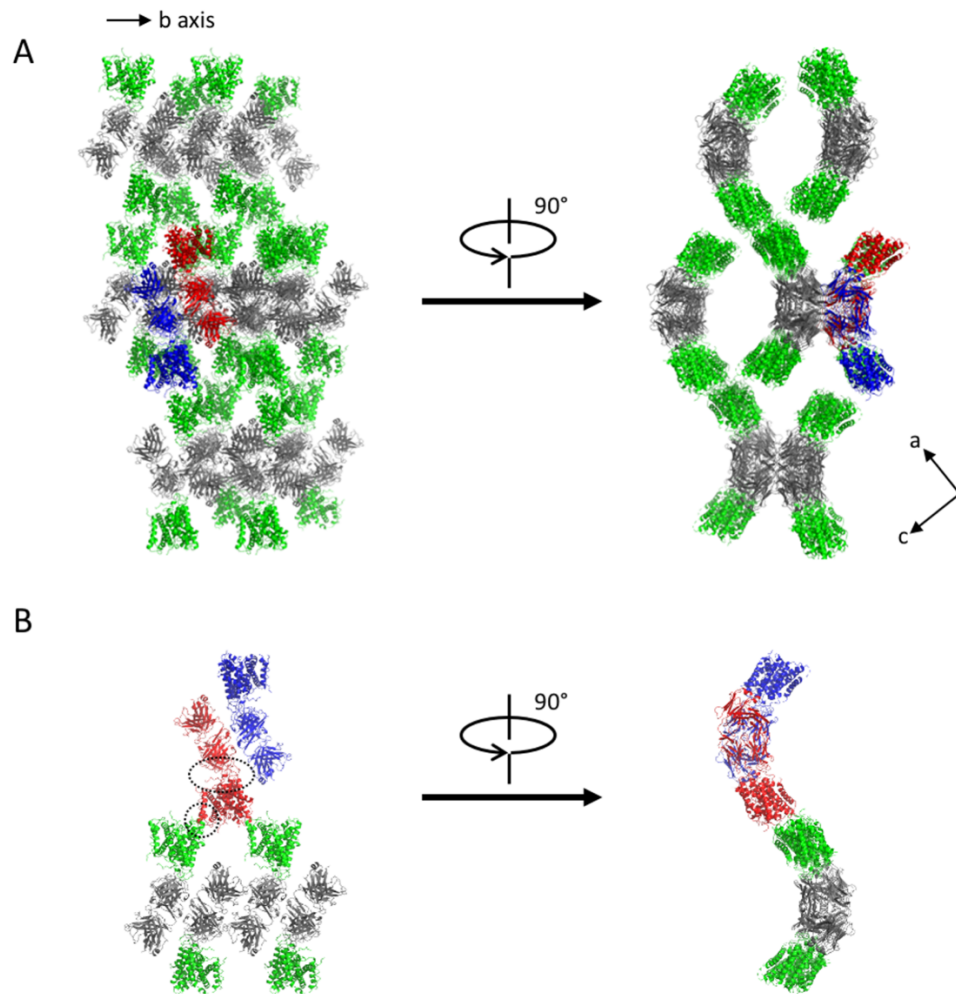

**Fig. S1. Crystal packing and asymmetric unit.** Related to Table 1 (A) Crystal packing showing SLC38A9-Fab complex lattice. Fab fragments (grey) form continuous layers in the crystallographic *b* axis, which are connected by SLC38A9 (green) layers along the crystallographic *ac* plane in a propeller-like head-to-head manner. One asymmetric unit is selected to show the structural block comprising two-fold SLC38A9-Fab molecules (red and blue). (B) Interactions between SLC38A9 molecules and Fab fragments. One SLC38A9 (red) makes biological contacts with the complementary determining regions (CDRs) of a Fab (red) by its luminal loops. It also has interactions between Loop 8-9 (red) and Loop 10-11 (green), which appear to be crystal contacts and non-specific.

Fig. S2

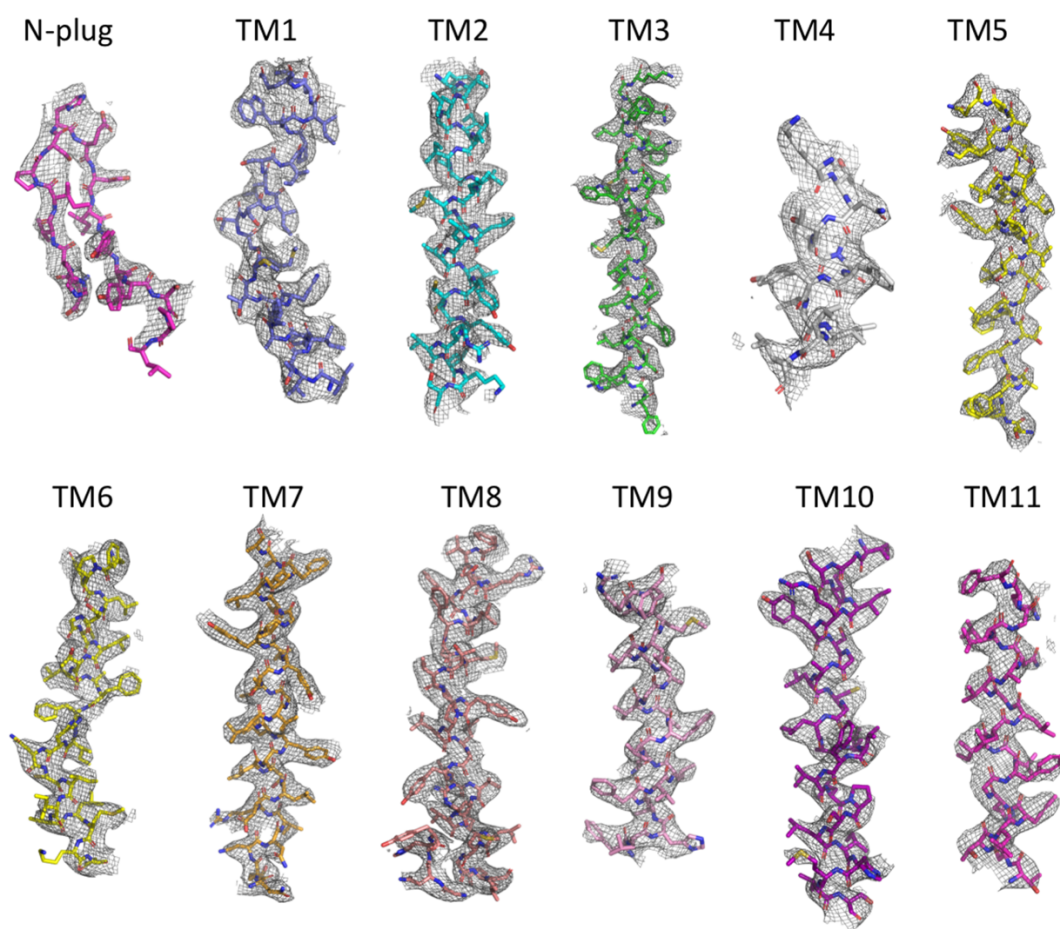

**Fig. S2.** Overall experimental density of N-plug and membrane helices of drSCL38A9 are shown with 2Fo-Fc map contoured at 1.2  $\sigma$  (gray mesh). Related to Figure 1

Fig. S3

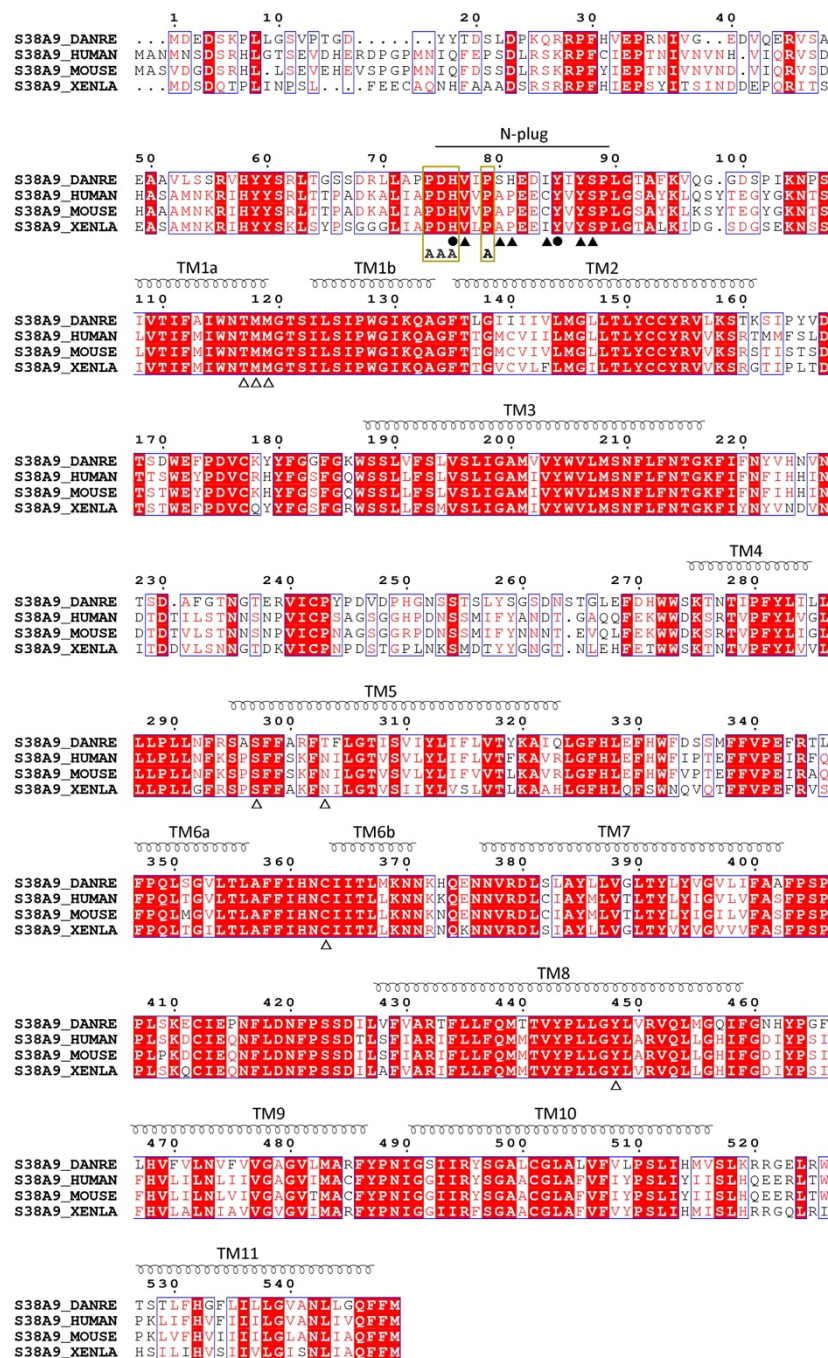

Fig. S3. Sequence alignment of SLC38A9 from zebrafish, human, mouse and clawed frog.

Related to Figure 2

The N-plug of drSLC38A9 (from Asp 75 to Pro 89) is noted. Residues which have hydrogen bonds between the N-plug and transmembrane helices were labeled by triangles, while residues forming intra-interactions of N-plug were marked with circles. Alanine substitutions of residues in yellow box will abolish the binding of hSLC38A9 to downstream Rag GTPase complex.

Fig. S4 A

Transmembrane Domain

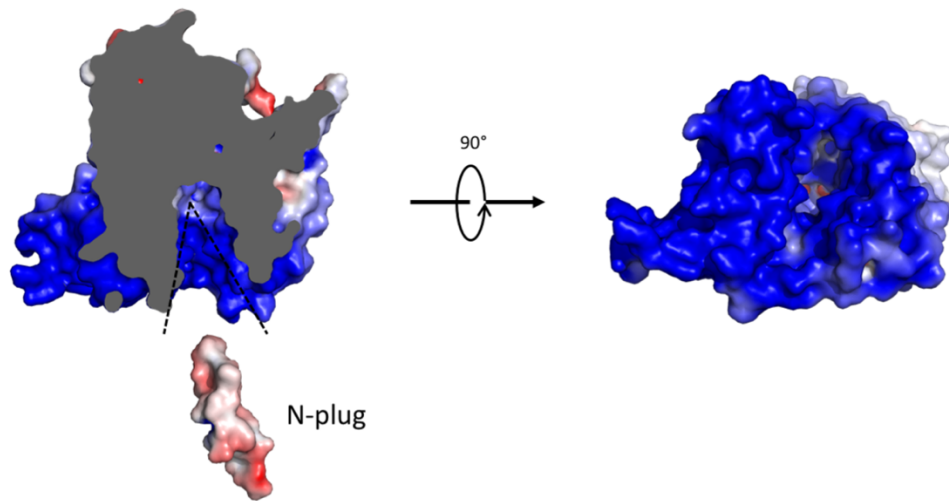

B

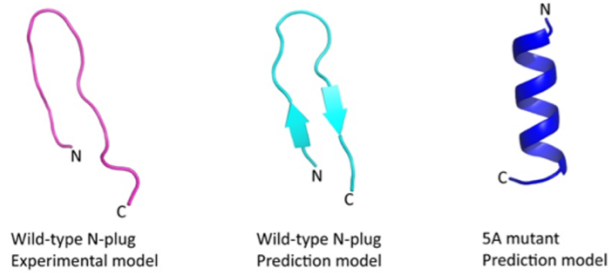

**Fig. S4. Electrostatic surface representation and folding of N-plug for drSLC38A9.**

Related to Figure 2

(A) N-plug has negatively charged surfaces and blocks the access leading to cytosolic side, which is dominantly positively charged. (B) The 5A mutations (P79A, S80A, H81A, E82A, and Y85A) of N-plug disrupt its secondary structure. P79A, S80A, H81A, and E82A locate in the beta-turn motif. Y85A breaks hydrogen bonds of the beta-sheet network (Shen *et al.*, 2014).

Fig. S5

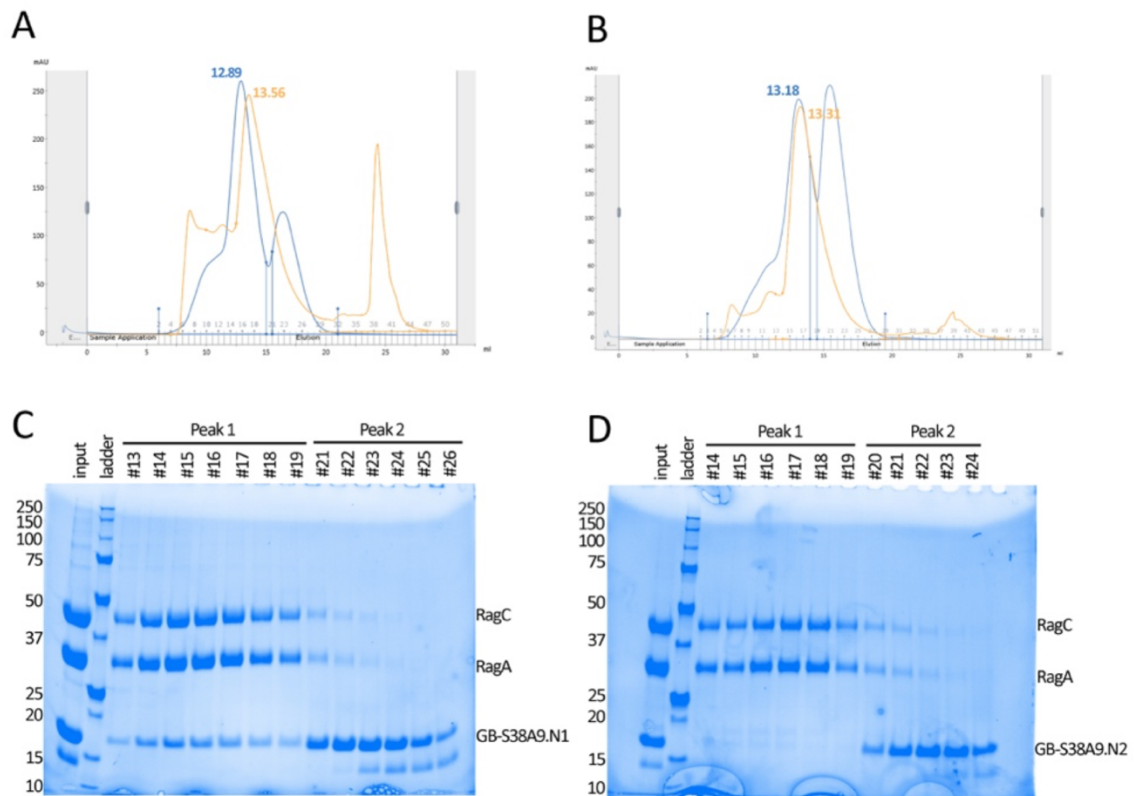

**Fig. S5. Co-purification of GB1 domain tagged N-terminal fragments of drSLC38A9 with zebrafish Rag GTPase complex.** Related to STAR Methods (A) The chromatogram displays a blue line with one peak at 12.89 mL retention volume (fractions 13-19) corresponding to drSLC38A9.N1 (1-96) and Rag GTPase complex and a second peak (fractions 21-26) corresponding to unbound N-terminal fragments. The orange superimposed curve depicts the zebrafish Rag GTPase complex eluted in the same column. Apparent peak shift was observed for the formation of drSLC38A9.N1 (1-96) and Rag GTPase complex. (B) Size exclusion chromatography profile of drSLC38A9.N1 (1-70) and Rag GTPase. No conspicuous peak shift was observed. (C and D) Fractions selected in (A) and (B) was sampled and analyzed on SDS-PAGE, including the input controls.
